# Supplementary material for: Reversible stability switching of a hairpin DNA via a photo-responsive linker unit
Source: Royal Society of Chemistry journal article supplement (doi:10.1039/b819643e), 2009-01-01
Supplement: b819643e.pdf [file b819643e.pdf]

## *Supporting Information*

# **Reversible Stability Switching of a Hairpin DNA via a Molecularly Designed Photo-Responsive Linker Unit**

**Li Wu,<sup>a</sup> Kazuya Koumoto<sup>a</sup> and Naoki Sugimoto<sup>a,b\*</sup>**

<sup>a</sup> *Frontier Institute for Biomolecular Engineering Research (FIBER), Konan University, 8-9-1 Okamoto, Higashinada-ku, Kobe, 658-8501, Japan.*

<sup>b</sup> *Department of Chemistry, Faculty of Science and Engineering, Konan University, 8-9-1 Okamoto, Higashinada-ku, Kobe, 658-8501, Japan.*

### **Contents**

|                                                                                                 |              |
|-------------------------------------------------------------------------------------------------|--------------|
| <b>1. UV spectral change of t-DNA2 with irradiating UV light</b>                                | <b>S2</b>    |
| <b>2. Comparison of HPLC charts of (A) DNA1 and (B) DNA2 before and after light irradiation</b> | <b>S2-S3</b> |
| <b>3. UV spectral change of c-DNA1 and c-DNA2 with irradiating Visible-light</b>                | <b>S3</b>    |
| <b>4. Isomerization behaviors of c-Az1 and c-Az2 upon heating</b>                               | <b>S4</b>    |
| <b>5. Typical UV melting curves and the dA/dT plots</b>                                         | <b>S4</b>    |

## 1. UV spectral change of t-DNA2 with irradiating UV light

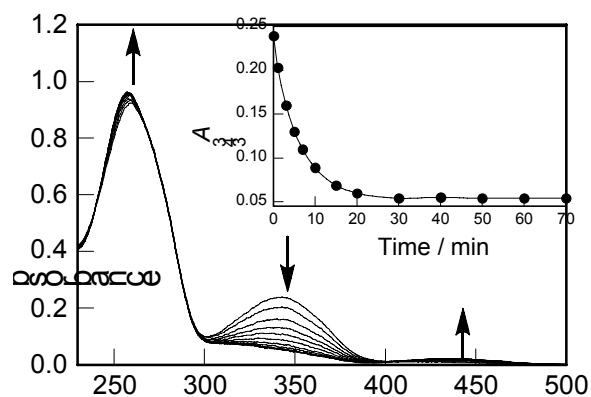

**Fig. S1** UV spectral changes of t-DNA2 with irradiating UV light [Funakoshi 4 W handy UV lamp, AGC Techno Glass V-Y43 filter ( $\lambda > 400$  nm)]. Inset: plots of absorbance at 343 nm ( $A_{343}$ ) as a function of irradiation time. Experiment was performed in a 10 mM phosphate buffer (pH 7.0) containing 100 mM NaCl and 0.1 mM EDTA. DNA concentrations were adjusted to 12  $\mu$ M.

## 2. Comparison of HPLC charts of (A) DNA1 and (B) DNA2 before and after light irradiation

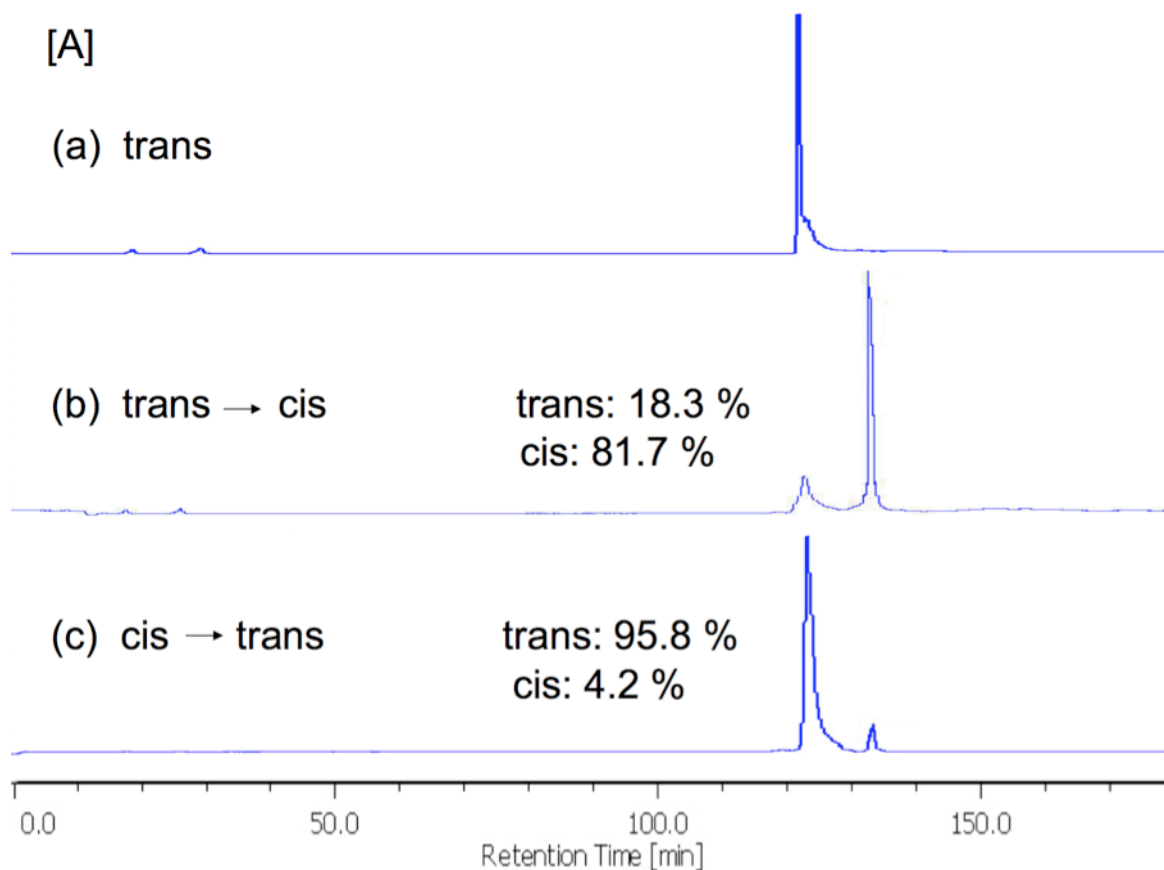

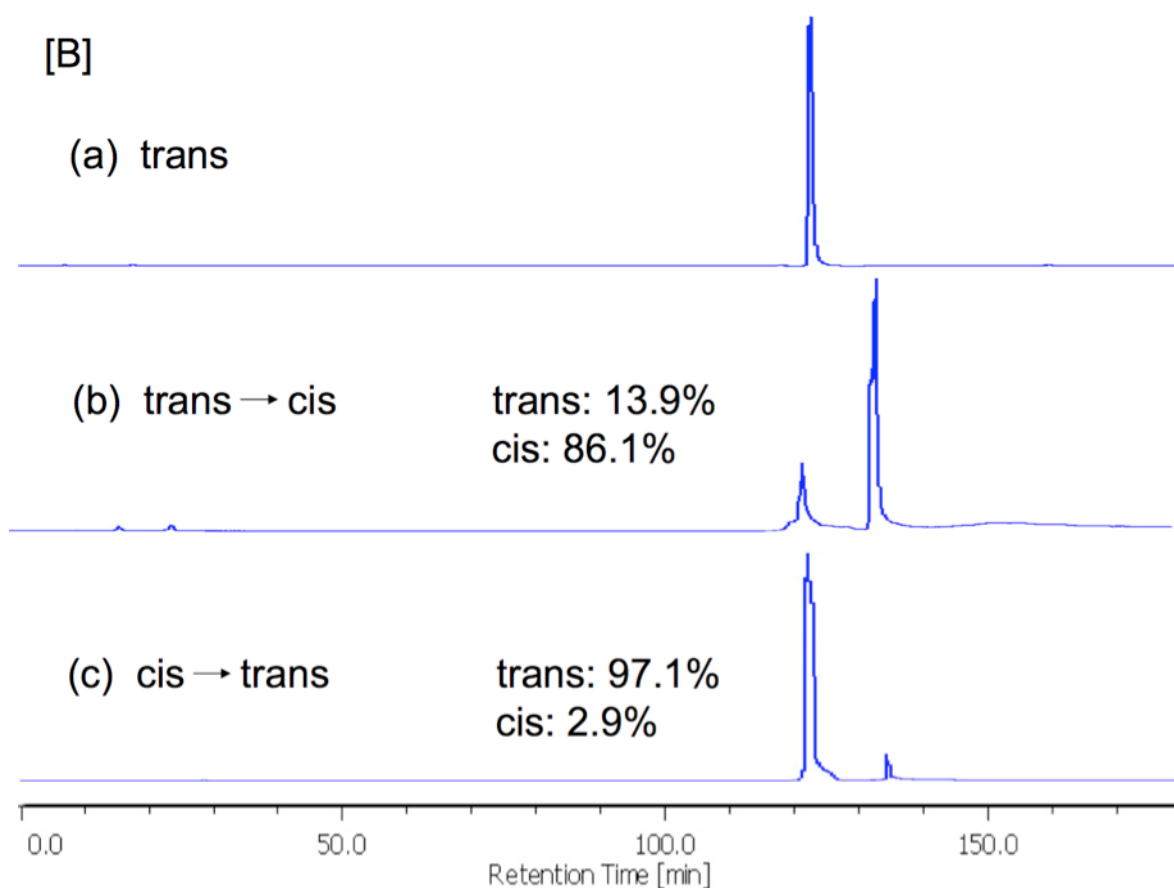

**Fig. S2** Comparison of HPLC charts of **DNA1** [A] and **DNA2** [B]; (a) before UV light irradiation, (b) after UV light irradiation, and (c) after Visible light irradiation. Experiments were performed in a 10 mM phosphate buffer (pH 7.0) containing 100 mM NaCl and 0.1 mM EDTA. DNA concentrations were adjusted to 100  $\mu$ M. The HPLC charts were obtained using a HPLC (JASCO LC-2000 Plus) at 25  $^{\circ}$ C: TSKgel ODS-80Ts (TOSOH, Japan) column were connected, water (0.01 M TEAA, pH7.0) and 50% MeOH (0.01 M TEAA, pH7.0) mixture as an elute solvent.

### 3. UV spectral change of c-DNA1 and c-DNA2 with irradiating Visible-light

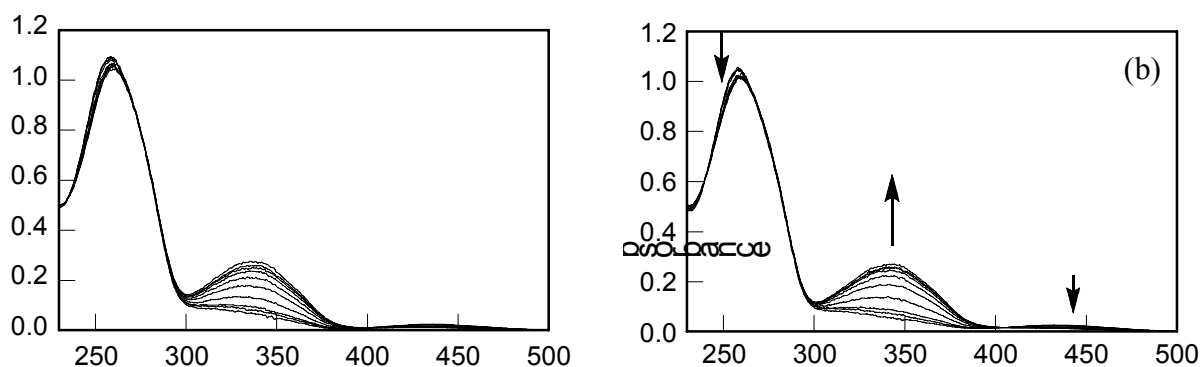

**Fig. S3** UV spectral changes of (a) c-DNA1 and (b) c-DNA2 with irradiating visible light [Funakoshi 4 W handy UV lamp, AGC Techno Glass V-Y43 filter ( $\lambda > 400$  nm)]. Experiment was performed in a 10 mM phosphate buffer (pH 7.0) containing 100 mM NaCl and 0.1 mM EDTA. DNA concentrations were adjusted to 12  $\mu$ M.

### 4. Isomerization behaviors of c-Az1 and c-Az2 upon heating

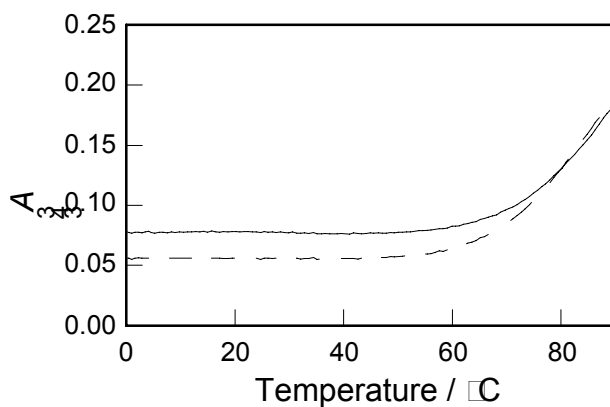

**Fig. S4** Plots of absorbance at 343 nm ( $A_{343}$ ) for c-DNA1 (solid line) and c-DNA2 (broken line) as a function of temperature (heating rate:  $0.5\text{ }^{\circ}\text{C min}^{-1}$ ). Experiment was performed using a UV-1700 spectrometer (Shimadzu) in a 10 mM phosphate buffer (pH 7.0) containing 100 mM NaCl and 0.1 mM EDTA. DNA concentrations were adjusted to  $12\text{ }\mu\text{M}$ .

## 5. Typical UV melting curves and the $dA/dT$ plots

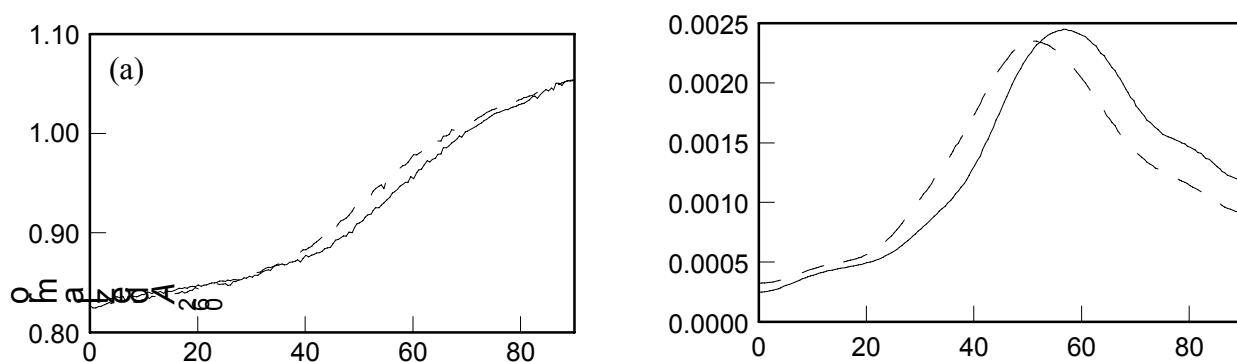

**Fig. S5** (a) Typical UV melting curves and (b) their  $dA/dT$  plots. t-DNA1 (broken line) and t-DNA2 (solid line). Experiments were performed in a 10 mM phosphate buffer (pH 7.0) containing 100 mM NaCl and 0.1 mM EDTA. DNA concentrations were adjusted to  $10\text{ }\mu\text{M}$ .
